# Supplementary material for: Effect of Targeted Messaging on Return to In-Person Visits During the COVID-19 Pandemic: A Randomized Clinical Trial
Source: PubMed Central journal article supplement (PMC8246312; doi:10.1001/jamanetworkopen.2021.15211), 2021-06-30
Supplement: jamanetwopen-e2115211-s003.pdf [file jamanetwopen-e2115211-s003.pdf]

## **Data Sharing Statement**

Cappola. Effect of Targeted Messaging on Return to In-Person Visits During the COVID-19 Pandemic. *JAMA Netw Open*. Published June 30, 2021. doi:10.1001/jamanetworkopen.2021.15211

### **Data**

**Data available:** No
